# Supplementary material for: In silico re-identification of properties of drug target proteins
Source: PubMed Central journal article supplement (PMC5471946; doi:10.1186/s12859-017-1639-3), 2017-05-31
Supplement: 12859_2017_1639_MOESM1_ESM.pdf [file 12859_2017_1639_MOESM1_ESM.pdf]

**Supplementary Table 1. Proportion and average as binary and continuous and p-value for all subsets.**

| Class 1           | Class 2           | t-test  | p-value  |          |           |          | Set A            |                  | Set B            |                  | Set C            |                  | Set D            |                  |
|-------------------|-------------------|---------|----------|----------|-----------|----------|------------------|------------------|------------------|------------------|------------------|------------------|------------------|------------------|
|                   |                   |         | Set A    | Set B    | Set C     | Set D    | hDP <sup>+</sup> | hDP <sup>0</sup> | hDP <sup>+</sup> | hDP <sup>0</sup> | hDP <sup>+</sup> | hDP <sup>0</sup> | hDP <sup>+</sup> | hDP <sup>0</sup> |
| Simple properties | Hydrophobicity    | ranksun | 7.57E-10 | 3.02E-12 | 2.22E-12  | 3.02E-12 | 134.671          | 118.484          | 119.359          | 97.028           | 134.671          | 116.020          | 119.359          | 96.108           |
| Simple properties | Residues          | ranksun | 1.55E-09 | 9.36E-12 | 2.42E-12  | 1.14E-12 | 478.000          | 421.000          | 418.000          | 346.000          | 478.000          | 413.000          | 418.000          | 342.000          |
| Simple properties | Isoelectric point | ranksun | 6.42E-02 | 1.05E-03 | 3.40E-02  | 9.64E-04 | 7.274            | 7.441            | 7.128            | 7.458            | 7.274            | 7.455            | 7.128            | 7.458            |
| Simple properties | Improbability     | ranksun | 5.65E-14 | 1.94E-10 | 2.17E-15  | 9.08E-11 | 0.719            | 0.742            | 0.703            | 0.732            | 0.719            | 0.744            | 0.703            | 0.733            |
| Simple properties | Ala               | ranksun | 4.77E-03 | 2.62E-02 | 5.77E-03  | 2.12E-02 | 7.053            | 6.818            | 7.299            | 6.964            | 7.053            | 6.823            | 7.299            | 6.960            |
| Simple properties | Cys               | ranksun | 8.07E-01 | 9.90E-01 | 7.11E-01  | 8.01E-01 | 2.023            | 2.030            | 1.975            | 1.968            | 2.023            | 2.013            | 1.975            | 1.955            |
| Simple properties | Asp               | ranksun | 1.20E-04 | 1.47E-04 | 1.19E-04  | 1.53E-04 | 4.771            | 4.569            | 4.841            | 4.566            | 4.771            | 4.569            | 4.841            | 4.569            |
| Simple properties | Glu               | ranksun | 8.59E-29 | 3.39E-11 | 1.36E-35  | 4.87E-13 | 5.985            | 6.655            | 6.280            | 6.818            | 5.985            | 6.757            | 6.280            | 6.897            |
| Simple properties | Phe               | ranksun | 4.15E-96 | 5.61E-35 | 2.15E-108 | 7.83E-39 | 4.467            | 3.575            | 4.240            | 3.497            | 4.467            | 3.513            | 4.240            | 3.448            |
| Simple properties | Gly               | ranksun | 2.57E-17 | 3.75E-17 | 8.24E-22  | 8.01E-19 | 6.859            | 6.298            | 6.910            | 6.140            | 6.859            | 6.219            | 6.910            | 6.087            |
| Simple properties | His               | ranksun | 2.79E-08 | 8.39E-01 | 9.96E-09  | 8.28E-01 | 2.316            | 2.448            | 2.431            | 2.400            | 2.316            | 2.452            | 2.431            | 2.400            |
| Simple properties | Ile               | ranksun | 9.23E-74 | 7.98E-36 | 6.35E-84  | 1.09E-38 | 5.196            | 4.188            | 5.101            | 4.124            | 5.196            | 4.103            | 5.101            | 4.072            |
| Simple properties | Lys               | ranksun | 7.30E-03 | 2.79E-01 | 2.58E-04  | 1.41E-01 | 5.395            | 5.442            | 5.593            | 5.612            | 5.395            | 5.514            | 5.593            | 5.645            |
| Simple properties | Leu               | ranksun | 2.53E-06 | 7.32E-01 | 2.30E-07  | 9.09E-01 | 10.220           | 9.950            | 10.166           | 10.294           | 10.220           | 9.913            | 10.166           | 10.274           |
| Simple properties | Met               | ranksun | 1.19E-37 | 6.18E-12 | 1.38E-39  | 2.49E-12 | 2.465            | 2.105            | 2.414            | 2.128            | 2.465            | 2.093            | 2.414            | 2.120            |
| Simple properties | Asn               | ranksun | 7.71E-14 | 1.18E-10 | 8.94E-16  | 5.09E-11 | 3.651            | 3.403            | 3.571            | 3.220            | 3.651            | 3.378            | 3.571            | 3.215            |
| Simple properties | Pro               | ranksun | 1.42E-12 | 2.37E-07 | 4.88E-14  | 8.45E-08 | 5.208            | 5.574            | 5.172            | 5.556            | 5.208            | 5.616            | 5.172            | 5.581            |
| Simple properties | Gln               | ranksun | 7.37E-72 | 2.42E-30 | 2.41E-81  | 2.24E-32 | 3.750            | 4.457            | 3.891            | 4.545            | 3.750            | 4.527            | 3.891            | 4.580            |
| Simple properties | Arg               | ranksun | 4.99E-23 | 2.00E-17 | 3.90E-26  | 1.58E-18 | 5.137            | 5.556            | 5.070            | 5.641            | 5.137            | 5.584            | 5.070            | 5.668            |
| Simple properties | Ser               | ranksun | 1.53E-61 | 1.28E-31 | 6.31E-67  | 4.61E-34 | 6.875            | 7.743            | 6.606            | 7.574            | 6.875            | 7.801            | 6.606            | 7.632            |
| Simple properties | Thr               | ranksun | 7.31E-06 | 1.18E-04 | 9.40E-08  | 4.82E-05 | 5.186            | 5.057            | 5.100            | 4.936            | 5.186            | 5.031            | 5.100            | 4.926            |
| Simple properties | Val               | ranksun | 2.92E-77 | 1.56E-34 | 1.50E-89  | 8.73E-38 | 6.831            | 5.876            | 6.777            | 5.858            | 6.831            | 5.790            | 6.777            | 5.817            |
| Simple properties | Trp               | ranksun | 5.86E-37 | 2.51E-07 | 1.53E-45  | 1.70E-08 | 1.433            | 1.111            | 1.313            | 1.136            | 1.433            | 1.067            | 1.313            | 1.124            |

|                      |                       |            |          |          |           |          |        |        |        |        |        |        |        |        |
|----------------------|-----------------------|------------|----------|----------|-----------|----------|--------|--------|--------|--------|--------|--------|--------|--------|
| Simple properties    | Tyr                   | ranksun    | 9.61E-53 | 2.94E-37 | 7.19E-62  | 2.80E-40 | 3.149  | 2.632  | 3.112  | 2.451  | 3.149  | 2.569  | 3.112  | 2.427  |
| Simple properties    | Tiny                  | ranksun    | 1.41E-05 | 3.51E-01 | 9.20E-05  | 3.95E-01 | 28.571 | 29.167 | 28.517 | 28.627 | 28.571 | 29.123 | 28.517 | 28.634 |
| Simple properties    | Small                 | ranksun    | 7.55E-01 | 1.50E-01 | 7.58E-01  | 1.19E-01 | 49.402 | 49.442 | 49.193 | 48.918 | 49.402 | 49.356 | 49.193 | 48.905 |
| Simple properties    | Aliphatic             | ranksun    | 2.64E-59 | 5.59E-23 | 6.26E-67  | 1.52E-25 | 29.550 | 27.603 | 29.597 | 27.907 | 29.550 | 27.421 | 29.597 | 27.807 |
| Simple properties    | Aromatic              | ranksun    | 2.44E-68 | 1.19E-34 | 2.09E-79  | 1.54E-38 | 11.724 | 10.236 | 11.450 | 9.906  | 11.724 | 10.076 | 11.450 | 9.813  |
| Simple properties    | Non_polar             | ranksun    | 3.27E-94 | 1.95E-38 | 4.17E-111 | 1.82E-43 | 55.837 | 52.889 | 55.510 | 52.941 | 55.837 | 52.533 | 55.510 | 52.716 |
| Simple properties    | Polar                 | ranksun    | 3.29E-94 | 1.96E-38 | 4.20E-111 | 1.84E-43 | 44.164 | 47.111 | 44.490 | 47.059 | 44.164 | 47.467 | 44.490 | 47.284 |
| Simple properties    | Charged               | ranksun    | 1.82E-39 | 7.28E-15 | 1.61E-49  | 2.82E-17 | 24.144 | 25.769 | 24.807 | 26.073 | 24.144 | 26.034 | 24.807 | 26.216 |
| Simple properties    | Basic                 | ranksun    | 7.55E-37 | 3.67E-16 | 2.09E-45  | 2.42E-18 | 13.110 | 13.934 | 13.386 | 14.130 | 13.110 | 14.074 | 13.386 | 14.213 |
| Simple properties    | Acidic                | ranksun    | 7.07E-13 | 3.22E-04 | 2.73E-16  | 4.62E-05 | 10.813 | 11.424 | 11.260 | 11.561 | 10.813 | 11.517 | 11.260 | 11.635 |
| EC                   | 1. Oxidoreductases    | chi-squire | 2.20E-16 | 2.20E-16 | 2.20E-16  | 2.20E-16 | 0.295  | 0.090  | 0.269  | 0.109  | 0.295  | 0.067  | 0.269  | 0.085  |
| EC                   | 2. Transferases       | chi-squire | 2.20E-16 | 2.20E-16 | 2.20E-16  | 2.20E-16 | 0.307  | 0.355  | 0.296  | 0.320  | 0.307  | 0.356  | 0.296  | 0.320  |
| EC                   | 3. Hydrolases         | chi-squire | 4.70E-11 | 1.69E-11 | 2.95E-16  | 5.62E-13 | 0.239  | 0.409  | 0.238  | 0.418  | 0.239  | 0.413  | 0.238  | 0.434  |
| EC                   | 4. Lyases             | chi-squire | 2.20E-16 | 3.85E-13 | 2.20E-16  | 3.18E-14 | 0.057  | 0.025  | 0.055  | 0.037  | 0.057  | 0.024  | 0.055  | 0.037  |
| EC                   | 5. Isomerases         | chi-squire | 2.20E-03 | 7.02E-03 | 1.92E-04  | 4.02E-03 | 0.022  | 0.028  | 0.024  | 0.032  | 0.022  | 0.026  | 0.024  | 0.033  |
| EC                   | 6. Ligases            | chi-squire | 2.49E-10 | 2.20E-16 | 2.99E-09  | 2.20E-16 | 0.079  | 0.094  | 0.117  | 0.084  | 0.079  | 0.113  | 0.117  | 0.091  |
| EC                   | Total                 | chi-squire | 2.20E-16 | 2.20E-16 | 2.20E-16  | 2.20E-16 | 0.511  | 0.184  | 0.572  | 0.166  | 0.511  | 0.160  | 0.572  | 0.152  |
| Subcellular location | Cytoplasm             | chi-squire | 2.20E-16 | 7.46E-14 | 2.20E-16  | 2.04E-10 | 0.110  | 0.220  | 0.115  | 0.231  | 0.110  | 0.251  | 0.115  | 0.211  |
| Subcellular location | Cytoskeleton          | chi-squire | 9.67E-01 | 1.00E+00 | 4.43E-01  | 1.00E+00 | 0.010  | 0.010  | 0.010  | 0.010  | 0.010  | 0.012  | 0.010  | 0.010  |
| Subcellular location | Endoplasmic reticulum | chi-squire | 9.67E-01 | 7.62E-01 | 5.48E-01  | 8.72E-01 | 0.010  | 0.010  | 0.011  | 0.010  | 0.010  | 0.012  | 0.011  | 0.010  |
| Subcellular location | Extracellular region  | chi-squire | 1.00E+00 | 2.17E-06 | 2.59E-01  | 4.01E-04 | 0.180  | 0.180  | 0.246  | 0.177  | 0.180  | 0.168  | 0.246  | 0.193  |
| Subcellular location | Golgi apparatus       | chi-squire | 7.67E-02 | 1.00E-03 | 5.20E-01  | 1.40E-02 | 0.001  | 0.000  | 0.004  | 0.000  | 0.001  | 0.001  | 0.004  | 0.001  |
| Subcellular location | Lysosome              | chi-squire | 2.03E-02 | 1.90E-02 | 1.02E-01  | 1.52E-02 | 0.003  | 0.001  | 0.005  | 0.001  | 0.003  | 0.001  | 0.005  | 0.001  |
| Subcellular location | Mitochondrion         | chi-squire | 1.08E-02 | 1.31E-02 | 5.79E-03  | 1.16E-02 | 0.110  | 0.090  | 0.115  | 0.088  | 0.110  | 0.088  | 0.115  | 0.087  |
| Subcellular location | Nucleus               | chi-squire | 9.88E-02 | 1.31E-02 | 1.52E-01  | 7.18E-04 | 0.290  | 0.310  | 0.274  | 0.327  | 0.290  | 0.307  | 0.274  | 0.334  |
| Subcellular location | Peroxisome            | chi-squire | 9.67E-01 | 1.00E+00 | 9.93E-01  | 1.00E+00 | 0.010  | 0.010  | 0.010  | 0.011  | 0.010  | 0.010  | 0.010  | 0.010  |

|                               |                          |            |          |          |          |          |         |         |         |         |         |         |         |         |
|-------------------------------|--------------------------|------------|----------|----------|----------|----------|---------|---------|---------|---------|---------|---------|---------|---------|
| Subcellular location          | Plasma membrane          | chi-square | 2.20E-16 | 2.20E-16 | 2.20E-16 | 2.20E-16 | 0.279   | 0.170   | 0.316   | 0.170   | 0.279   | 0.150   | 0.316   | 0.158   |
| PEST region                   | PEST region              | chi-square | 2.20E-16 | 3.25E-12 | 2.20E-16 | 4.36E-13 | 25.475  | 36.558  | 0.205   | 0.326   | 0.583   | 0.672   | 0.205   | 0.331   |
| Secondary structure           | H(alpha-helix)           | ranksun    | 2.31E-01 | 8.42E-02 | 2.58E-02 | 3.73E-02 | 35.600  | 35.600  | 37.400  | 37.900  | 35.600  | 35.900  | 37.400  | 38.100  |
| Secondary structure           | E(beta-chain)            | ranksun    | 2.73E-64 | 5.01E-28 | 4.89E-77 | 1.42E-31 | 25.500  | 22.000  | 24.800  | 21.800  | 25.500  | 21.600  | 24.800  | 21.600  |
| Secondary structure           | T(turn)                  | ranksun    | 2.11E-07 | 3.37E-03 | 8.40E-07 | 3.79E-03 | 21.700  | 22.400  | 21.200  | 21.900  | 21.700  | 22.400  | 21.200  | 21.900  |
| Secondary structure           | C(coil)                  | ranksun    | 2.60E-19 | 5.26E-08 | 4.11E-21 | 9.38E-09 | 19.900  | 21.200  | 19.800  | 21.100  | 19.900  | 21.300  | 19.800  | 21.200  |
| Signal peptide cleavage       | SignalP                  | chi-square | 2.20E-16 | 9.01E-15 | 2.20E-16 | 2.20E-16 | 0.276   | 0.157   | 0.244   | 0.140   | 0.276   | 0.139   | 0.244   | 0.134   |
| Transmembrane helices         | TMHMM                    | chi-square | 2.20E-16 | 2.20E-16 | 2.20E-16 | 2.20E-16 | 0.444   | 0.247   | 0.345   | 0.213   | 0.444   | 0.225   | 0.345   | 0.205   |
| Transmembrane helices         | TMHMM-7helices           | chi-square | 2.22E-12 | 8.39E-09 | 2.20E-16 | 3.03E-11 | 0.069   | 0.034   | 0.042   | 0.014   | 0.069   | 0.028   | 0.042   | 0.012   |
| PTMs                          | Phosphorylation          | chi-square | 1.90E-14 | 2.20E-16 | 8.48E-15 | 1.24E-10 | 0.898   | 0.822   | 0.883   | 0.659   | 0.898   | 0.820   | 0.883   | 0.785   |
| PTMs                          | Phosphorylation-S        | chi-square | 2.82E-06 | 2.20E-16 | 3.71E-06 | 2.65E-05 | 0.742   | 0.685   | 0.723   | 0.466   | 0.742   | 0.685   | 0.723   | 0.648   |
| PTMs                          | Phosphorylation-Y        | chi-square | 4.45E-06 | 2.20E-16 | 4.05E-06 | 7.69E-06 | 0.638   | 0.578   | 0.609   | 0.317   | 0.638   | 0.577   | 0.609   | 0.525   |
| PTMs                          | Phosphorylation-T        | chi-square | 2.20E-16 | 2.20E-16 | 2.20E-16 | 2.20E-16 | 0.672   | 0.548   | 0.658   | 0.288   | 0.672   | 0.543   | 0.658   | 0.493   |
| PTMs                          | Ubiquitination           | chi-square | 5.17E-03 | 6.35E-07 | 3.75E-02 | 2.56E-06 | 0.443   | 0.406   | 0.520   | 0.428   | 0.443   | 0.416   | 0.520   | 0.433   |
| PTMs                          | Acetylation              | chi-square | 3.04E-13 | 4.08E-16 | 3.39E-12 | 2.20E-15 | 0.411   | 0.320   | 0.444   | 0.303   | 0.411   | 0.324   | 0.444   | 0.306   |
| Essentiality                  | Essential                | chi-square | 2.20E-16 | 2.20E-16 | 2.20E-16 | 2.20E-16 | 0.236   | 0.120   | 0.227   | 0.093   | 0.235   | 0.116   | 0.227   | 0.091   |
| Gene expression pattern       | Expression level         | ranksun    | 4.50E-04 | 8.22E-04 | 9.34E-04 | 1.55E-03 | 212.706 | 201.868 | 219.588 | 217.907 | 212.706 | 203.091 | 219.588 | 231.931 |
| Gene expression pattern       | Tissue specificity       | ranksun    | 2.20E-16 | 2.81E-16 | 2.20E-16 | 2.20E-16 | 0.788   | 0.762   | 0.779   | 0.753   | 0.788   | 0.758   | 0.779   | 0.751   |
| Protein duplication           | PD>=2                    | chi-square | 1.80E-11 | 8.39E-09 | 2.20E-16 | 4.84E-14 | 0.827   | 0.707   | 0.489   | 0.385   | 0.827   | 0.672   | 0.489   | 0.353   |
| Protein surface accessibility | SABLE                    | ranksun    | 2.20E-16 | 2.20E-16 | 2.20E-16 | 2.20E-16 | 22.834  | 26.803  | 22.938  | 27.593  | 22.834  | 27.222  | 22.938  | 27.868  |
| Protein surface accessibility | SABLE&phosphorylation    | chi-square | 3.73E-01 | 2.24E-01 | 3.54E-01 | 2.20E-01 | 0.943   | 0.896   | 0.947   | 0.867   | 0.943   | 0.895   | 0.947   | 0.866   |
| Protein surface accessibility | SABLE&phosphorylation(s) | chi-square | 6.41E-02 | 2.26E-02 | 5.80E-02 | 2.20E-02 | 0.925   | 0.816   | 0.947   | 0.780   | 0.925   | 0.813   | 0.947   | 0.779   |
| Protein surface accessibility | SABLE&phosphorylation(T) | chi-square | 7.78E-02 | 1.01E-01 | 7.25E-02 | 9.70E-02 | 0.811   | 0.689   | 0.789   | 0.648   | 0.811   | 0.687   | 0.789   | 0.647   |
| Protein surface accessibility | SABLE&phosphorylation(Y) | chi-square | 5.92E-02 | 9.81E-03 | 5.16E-02 | 9.61E-03 | 0.736   | 0.599   | 0.763   | 0.539   | 0.736   | 0.594   | 0.763   | 0.539   |
| Protein surface accessibility | SABLE&Acetylation        | chi-square | 4.44E-01 | 2.86E-01 | 4.28E-01 | 2.85E-01 | 0.528   | 0.466   | 0.500   | 0.401   | 0.528   | 0.464   | 0.500   | 0.401   |
| Protein surface accessibility | SABLE&ubiquitination     | chi-square | 5.16E-02 | 8.49E-02 | 4.68E-02 | 8.15E-02 | 0.566   | 0.423   | 0.553   | 0.401   | 0.566   | 0.421   | 0.553   | 0.400   |
