# Supplementary material for: In silico re-identification of properties of drug target proteins
Source: PubMed Central journal article supplement (PMC5471946; doi:10.1186/s12859-017-1639-3), 2017-05-31
Supplement: 12859_2017_1639_MOESM4_ESM.pdf [file 12859_2017_1639_MOESM4_ESM.pdf]

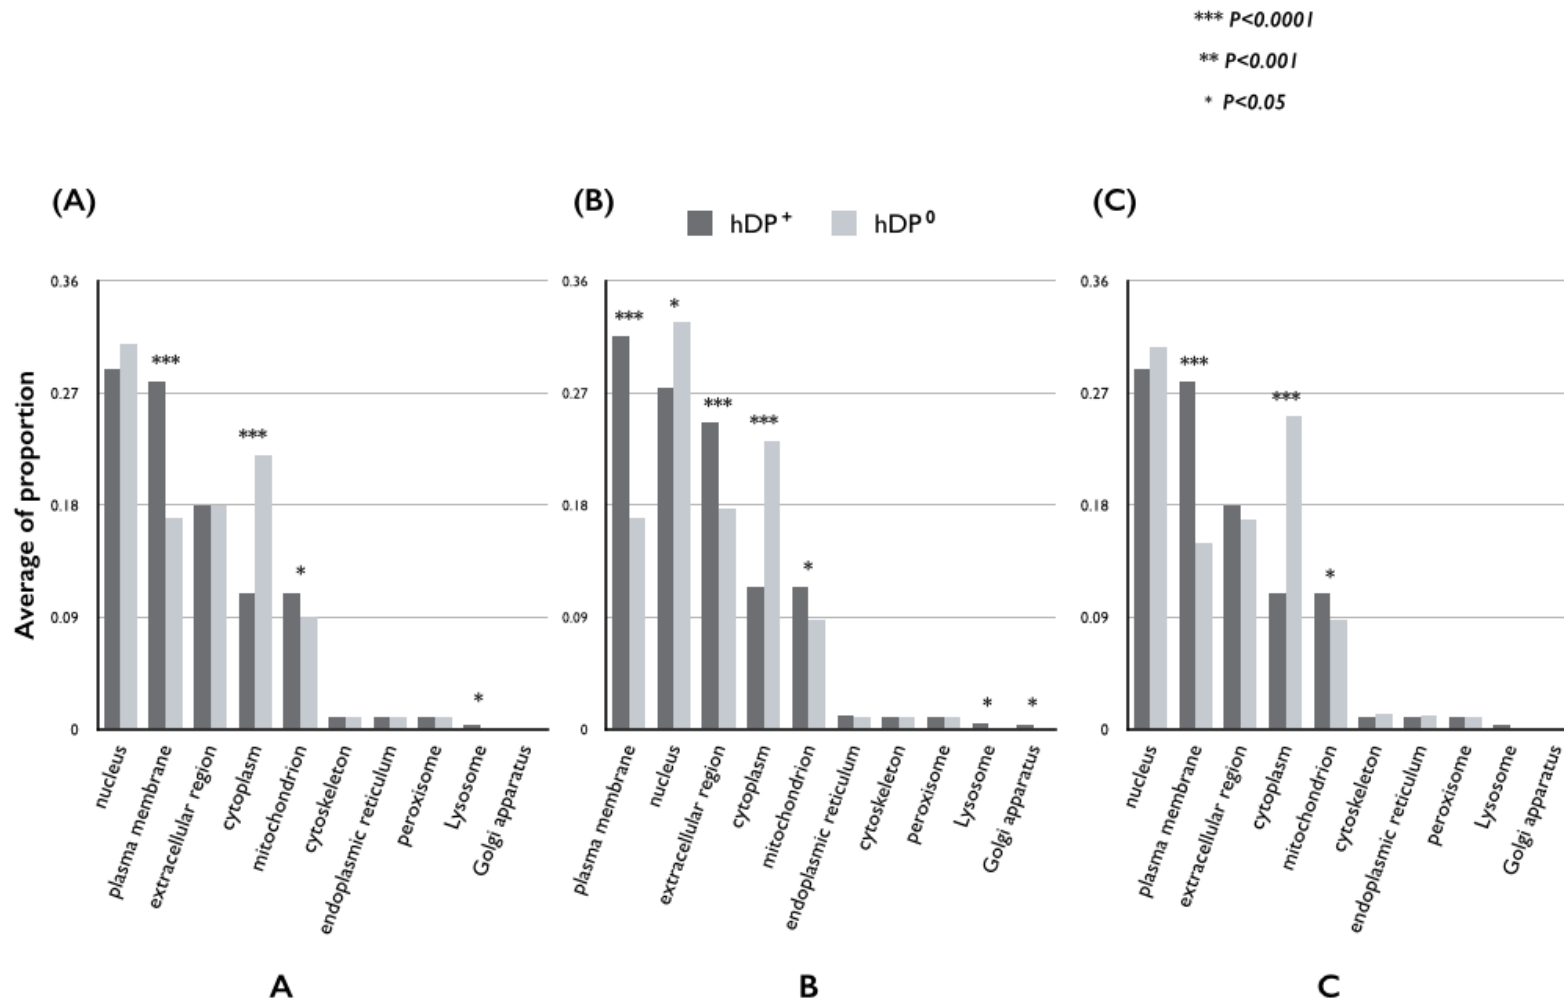

Supplementary Figure 3. Result of subcellular location: (A) for set A. (B) for set B. (C) for Set C.
