# Supplementary material for: In silico re-identification of properties of drug target proteins
Source: PubMed Central journal article supplement (PMC5471946; doi:10.1186/s12859-017-1639-3), 2017-05-31
Supplement: 12859_2017_1639_MOESM7_ESM.pdf [file 12859_2017_1639_MOESM7_ESM.pdf]

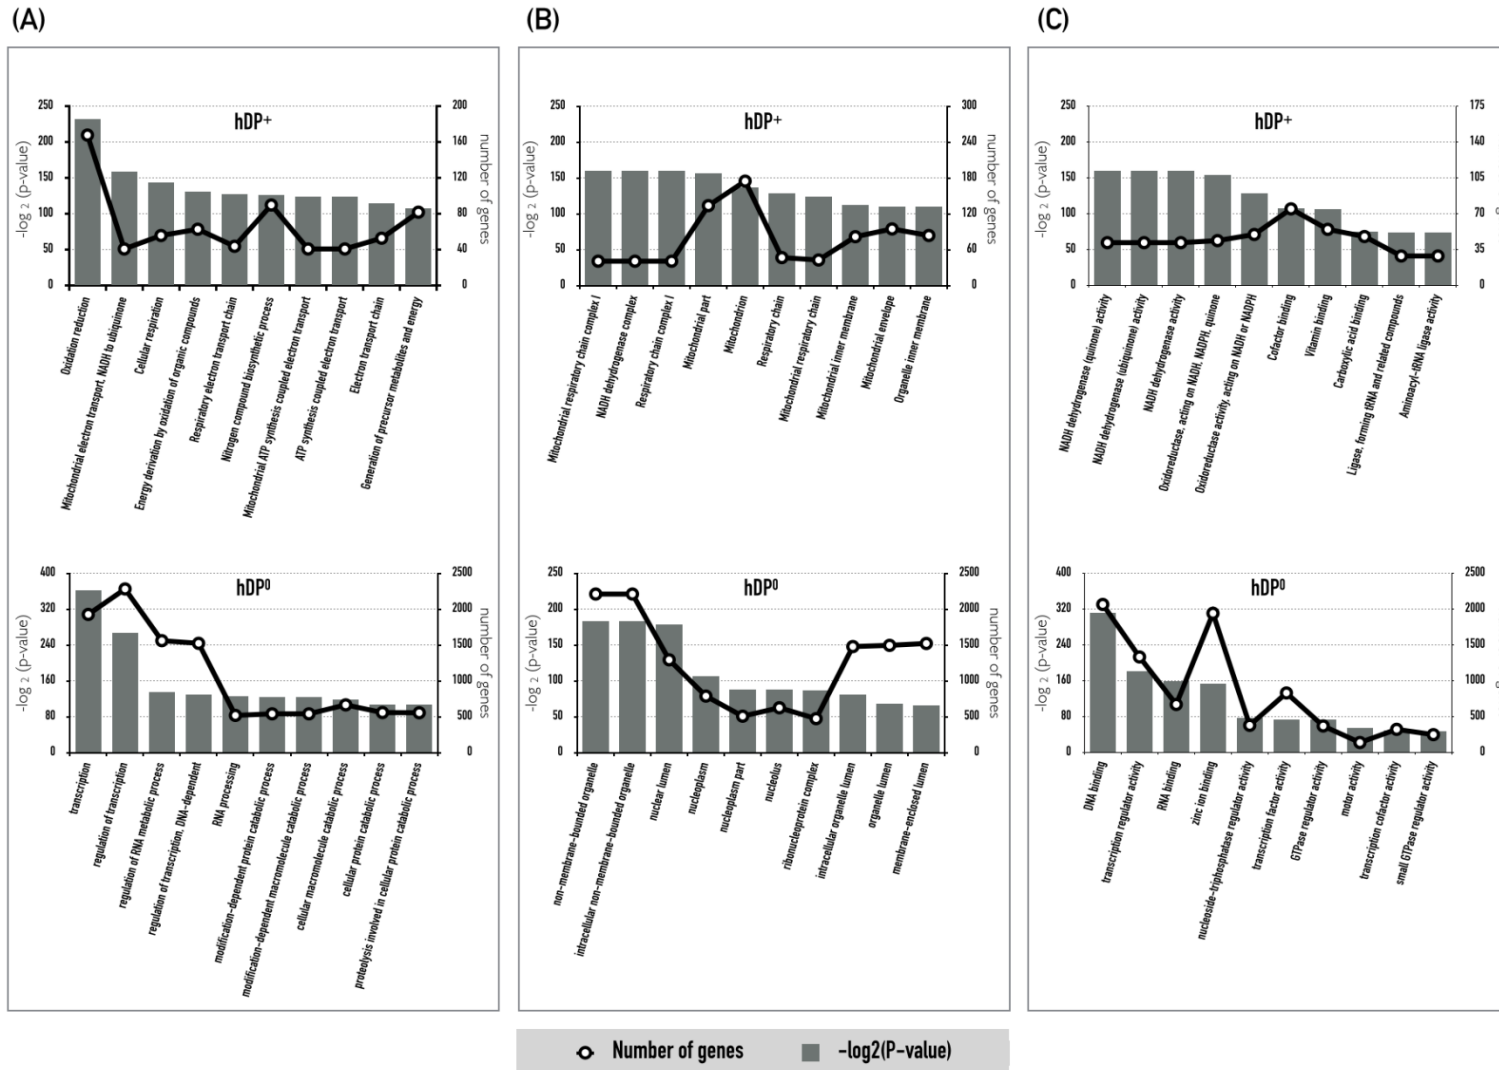

Supplementary Figure 6. Result of gene ontology annotation for set C: (A) Biological processes. (B) Cellular component. (C) Molecular function.
