# Supplementary material for: In silico re-identification of properties of drug target proteins
Source: PubMed Central journal article supplement (PMC5471946; doi:10.1186/s12859-017-1639-3), 2017-05-31
Supplement: 12859_2017_1639_MOESM8_ESM.pdf [file 12859_2017_1639_MOESM8_ESM.pdf]

|                        |                       |               |    |    |    |    |    |    |    |
|------------------------|-----------------------|---------------|----|----|----|----|----|----|----|
| Widely used properties | Tyr                   | W'            | W' | W' | W' | W' | W' | W' | W' |
| Widely used properties | Tiny                  | W'            | x  | W' | x  | W' | x  | W' | x  |
| Widely used properties | Small                 | x             | x  | x  | x  | x  | x  | x  | x  |
| Widely used properties | Aliphatic             | W'            | W' | W' | W' | W' | W' | W' | W' |
| Widely used properties | Aromatic              | W'            | W' | W' | W' | W' | W' | W' | W' |
| Widely used properties | Non_polar             | W'            | W' | W' | W' | W' | W' | W' | W' |
| Widely used properties | Polar                 | W'            | W' | W' | W' | W' | W' | W' | W' |
| Widely used properties | Charged               | W'            | W' | W' | W' | W' | W' | W' | W' |
| Widely used properties | Basic                 | W'            | W' | W' | W' | W' | W' | W' | W' |
| Widely used properties | Acidic                | W'            | W' | W' | W' | W' | W' | W' | W' |
| Widely used properties | 1. Oxidoreductases    | W'            | W' | W' | W' | W' | W' | W' | W' |
| Widely used properties | 2. Transferases       | W'            | W' | W' | W' | W' | W' | W' | W' |
| Widely used properties | 3. Hydrolases         | W'            | W' | W' | W' | W' | W' | W' | W' |
| Widely used properties | 4. Lyases             | W'            | W' | W' | W' | W' | W' | W' | W' |
| Widely used properties | 5. Isomerases         | W'            | W' | W' | W' | x  | x  | W' | x  |
| Widely used properties | 6. Ligases            | W'            | W' | W' | W' | W' | W' | W' | W' |
| Widely used properties | EC(Total)             | W'            | W' | W' | W' | W' | W' | W' | W' |
| Widely used properties | Cytoplasm             | W'            | W' | W' | W' | W' | W' | W' | W' |
| Widely used properties | Cytoskeleton          | x             | x  | x  | x  | x  | x  | x  | x  |
| Widely used properties | Endoplasmic reticulum | x             | x  | x  | x  | x  | x  | x  | x  |
| Widely used properties | Extracellular region  | x             | W' | x  | W' | x  | W' | x  | W' |
| Widely used properties | Golgi apparatus       | x             | W' | x  | W' | x  | x  | x  | x  |
| Widely used properties | Lysosome              | W'(partially) | W' | x  | W' | x  | x  | x  | x  |
| Widely used properties | Mitochondrion         | W'            | W' | W' | W' | x  | x  | x  | x  |
| Widely used properties | Nucleus               | x             | W' | x  | W' | x  | x  | x  | x  |
| Widely used properties | Peroxisome            | x             | x  | x  | x  | x  | x  | x  | x  |

|                           |                         |    |    |               |               |               |    |               |               |
|---------------------------|-------------------------|----|----|---------------|---------------|---------------|----|---------------|---------------|
| Widely used properties    | Plasma membrane         | W' | W' | W'            | W'            | W'            | W' | W'            | W'            |
| Widely used properties    | PEST region             | W' | W' | W'            | W'            | W'            | W' | W'            | W'            |
| Widely used properties    | H(alpha-helix)          | x  | x  | W'(partially) | W'(partially) | x             | x  | x             | x             |
| Widely used properties    | E(beta-chain)           | W' | W' | W'            | W'            | W'            | W' | W'            | W'            |
| Widely used properties    | T(turn)                 | W' | W' | W'            | W'            | W'(partially) | x  | W'(partially) | x             |
| Widely used properties    | C(coil)                 | W' | W' | W'            | W'            | W'            | W' | W'            | W'            |
| Widely used properties    | SignalP                 | W' | W' | W'            | W'            | W'            | W' | W'            | W'            |
| Widely used properties    | TMHMM                   | W' | W' | W'            | W'            | W'            | W' | W'            | W'            |
| Widely used properties    | TMHMM-7helices          | W' | W' | W'            | W'            | W'            | W' | W'            | W'            |
| Widely used properties    | Phosphorylation         | W' | W' | W'            | W'            | W'            | W' | W'            | W'            |
| Widely used properties    | Phosphorylation-S       | W' | W' | W'            | W'            | W'            | W' | W'            | W'            |
| Widely used properties    | Phosphorylation-Y       | W' | W' | W'            | W'            | W'            | W' | W'            | W'            |
| Widely used properties    | Phosphorylation-T       | W' | W' | W'            | W'            | W'            | W' | W'            | W'            |
| Widely used properties    | Ubiquitination          | W' | W' | x             | W'            | x             | W' | x             | W'(partially) |
| Widely used properties    | Acetylation             | W' | W' | W'            | W'            | W'            | W' | W'            | W'            |
| Newly proposed properties | Essential               | N' | N' | N'            | N'            | N'            | N' | N'            | N'            |
| Newly proposed properties | Expression level        | N' | N' | N'            | N'            | N'            | N' | N'            | x             |
| Newly proposed properties | Tissue specificity      | N' | N' | N'            | N'            | N'            | N' | N'            | N'            |
| Newly proposed properties | PD>=2                   | N' | N' | N'            | N'            | N'            | N' | N'            | N'            |
| Newly proposed properties | SABLE                   | N' | N' | N'            | N'            | N'            | N' | N'            | N'            |
| Newly proposed properties | SABLE&phospolylation    | x  | x  | x             | x             | x             | x  | x             | x             |
| Newly proposed properties | SABLE&phospolylation(s) | x  | x  | x             | x             | x             | x  | x             | x             |
| Newly proposed properties | SABLE&phospolylation(T) | x  | x  | x             | x             | x             | x  | x             | x             |
| Newly proposed properties | SABLE&phospolylation(Y) | x  | x  | x             | x             | x             | x  | x             | x             |
| Newly proposed properties | SABLE&Acetylation       | x  | x  | x             | x             | x             | x  | x             | x             |
| Newly proposed properties | SABLE&ubiqitination     | x  | x  | x             | x             | x             | x  | x             | x             |
