# Supplementary material for: In silico re-identification of properties of drug target proteins
Source: PubMed Central journal article supplement (PMC5471946; doi:10.1186/s12859-017-1639-3), 2017-05-31
Supplement: 12859_2017_1639_MOESM9_ESM.pdf [file 12859_2017_1639_MOESM9_ESM.pdf]

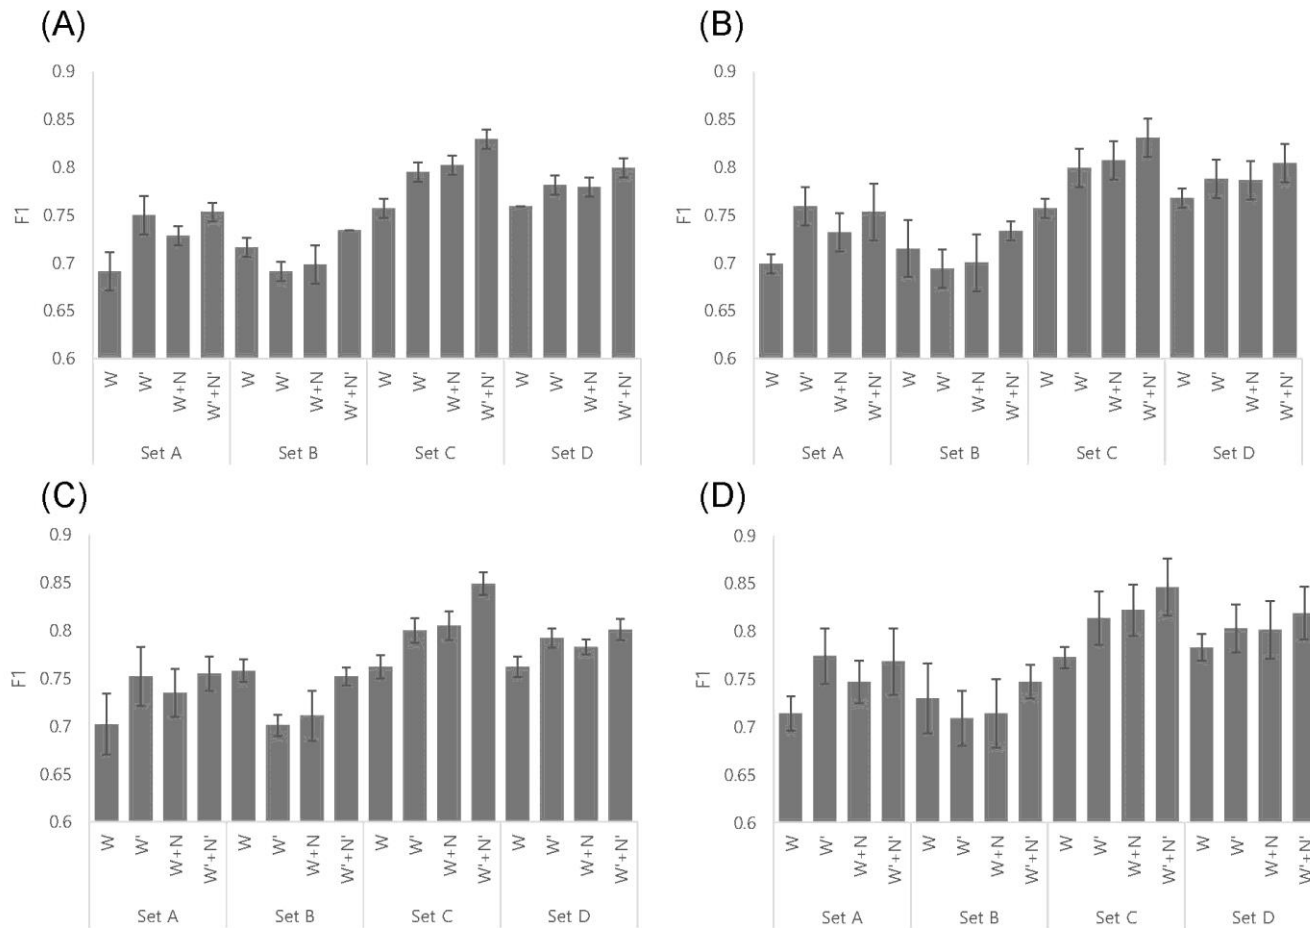

**Supplementary Figure 7. 10-fold cross-validation and 10X10 cross-validation with standard derivation. (A) 10-fold cross-validation for SVM. (B) 10-fold cross-validation for RF. (C) 10X10 fold cross-validation for SVM. (D) 10X10 fold cross-validation for RF.**
